# Supplementary material for: Self-Assembled Serpentine Ni3Si2O5(OH)4 Hybrid Sheets with Ammonium Polyphosphate for Fire Safety Enhancement of Polylactide Composites
Source: MDPI journal article supplement (doi:10.3390/polym14235255), 2022-12-01
Supplement: s1 [file s1]

## Supporting Information

### Self-assembled serpentine $\text{Ni}_3\text{Si}_2\text{O}_5(\text{OH})_4$ hybrid sheets with ammonium polyphosphate for fire safety enhancement of polylactide composites

Xiaohong Yi <sup>a</sup>, Jingshu Huang <sup>b</sup>, Yizhang Tong <sup>b</sup>, Hui Zhao <sup>c, \*</sup>, Xianwu Cao <sup>b</sup>, Wei Wu <sup>a, b, \*</sup>

<sup>a</sup> Jihua Laboratory, Foshan 528200, China.

<sup>b</sup> Key Laboratory of Polymer Processing Engineering of Ministry of Education, South China University of Technology, Guangzhou 510640, China.

<sup>c</sup> Guangxi Key Laboratory of Calcium Carbonate Resources Comprehensive Utilization, College of Materials and Chemical Engineering, Hezhou University, Hezhou City 542899, China.

\* Correspondence: [wuwei@jihualab.ac.cn](mailto:wuwei@jihualab.ac.cn) (W. Wu), [zhzh@gxu.edu.cn](mailto:zhzh@gxu.edu.cn) (H. Zhao)

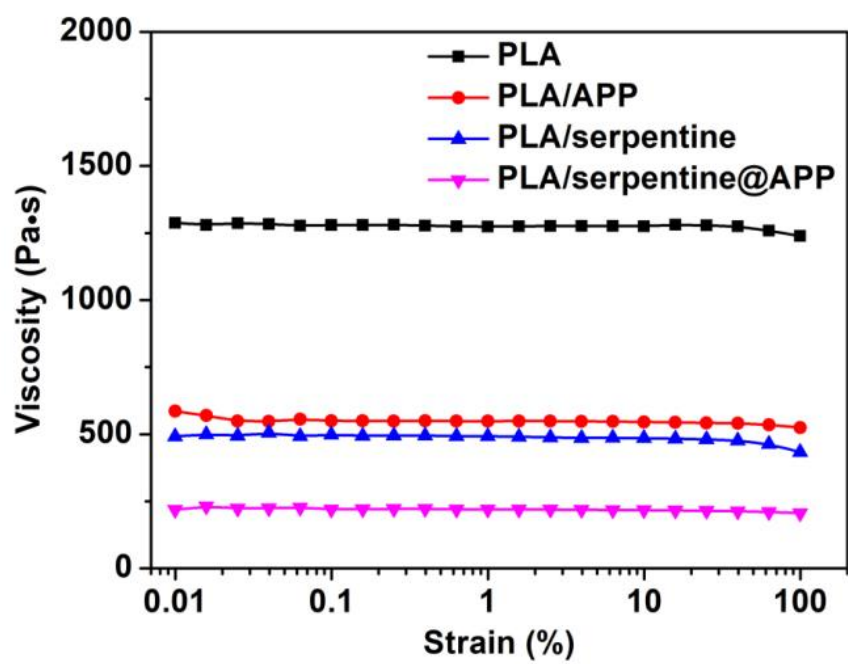

**Figure S1.** Strain sweep of pure PLA and its composites.

**Table S1.** TGA data of APP, serpentine and serpentine@APP.

| Samples        | $T_{10}$ (°C) | $T_{\max}$ (°C) | Residue at 700 °C (wt%) |
|----------------|---------------|-----------------|-------------------------|
| APP            | 309.4         | 357.1           | 63.1                    |
| serpentine     | 106.6         | 56.8            | 75.3                    |
| serpentine@APP | 182.1         | 50.9            | 79.8                    |
